# Supplementary material for: Mn Cluster-Embedded N/F Co-Doped Carbon toward Mild Aqueous Supercapacitors
Source: MDPI journal article supplement (doi:10.3390/ma17061417), 2024-03-20
Supplement: s1 [file s1]

## Supporting Information

# Mn Cluster-Embedded N/F Co-Doped Carbon toward Mild Aqueous Supercapacitors

Chen Zheng <sup>1,†</sup>, Xu Han <sup>2,†</sup>, Fangfang Sun <sup>1</sup>, Yue Zhang <sup>1</sup>, Zihang Huang <sup>1,\*</sup> and Tianyi Ma <sup>3,\*</sup>

<sup>1</sup> Institute of Clean Energy Chemistry, Key Laboratory for Green Synthesis and Preparative Chemistry of Advanced Materials of Liaoning Province, College of Chemistry, Liaoning University, Shenyang 110036, China; zc13940417032@163.com (C.Z.); sff108250@163.com (F.S.); yuezhang1229@163.com (Y.Z.)

<sup>2</sup> Engineering Laboratory of Advanced Energy Materials, Ningbo Institute of Materials Technology and Engineering, Chinese Academy of Sciences, Ningbo 315201, China; hanxu@nimte.ac.cn

<sup>3</sup> School of Science, RMIT University, Melbourne, VIC 3000, Australia

\* Correspondence: huangzihang@lnu.edu.cn (Z.H.); tianyi.ma@rmit.edu.au (T.M.)

† These authors contributed equally to this work.

## Supplementary Figures and Tables

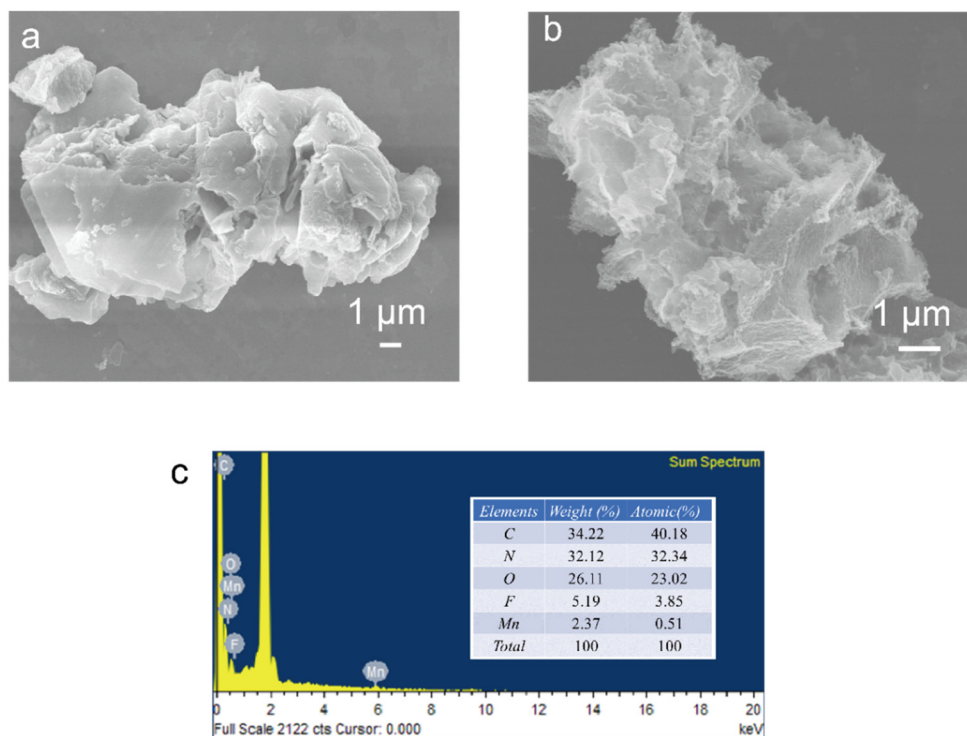

**Figure S1.** SEM image of (a) the NC; (b) the NCM-0; (c) EDS spectra collected for NCM-0.5 sample.

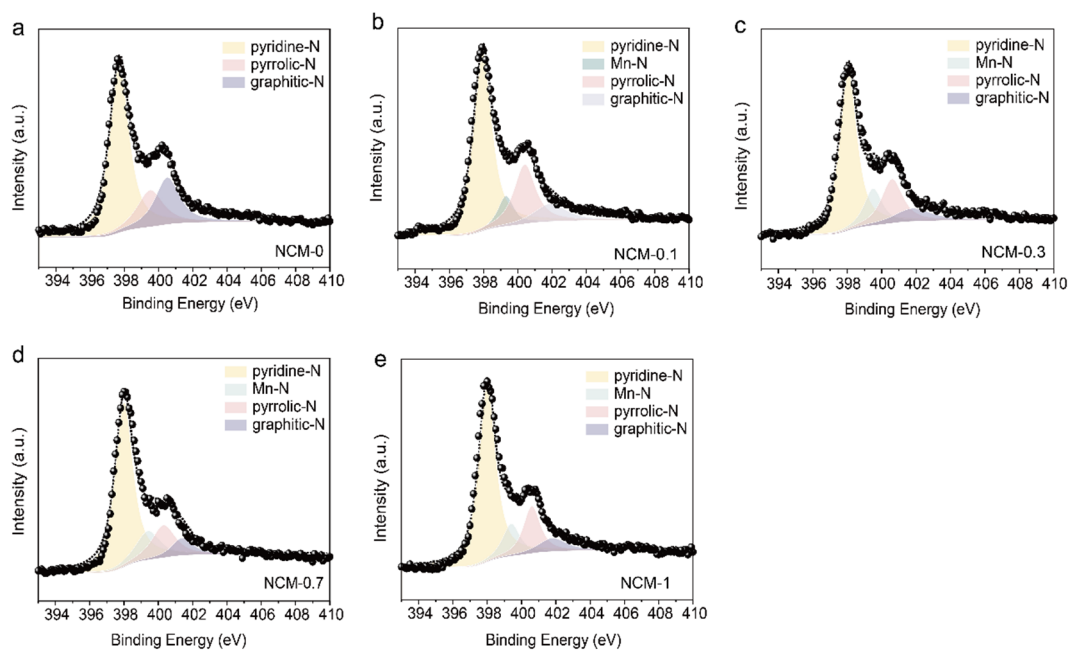

**Figure S2.** High resolution XPS spectrums of N 1s of (a) NCM-0; (b) NCM-0.1; (c) NCM-0.3; (d) NCM-0.7; (e) NCM-1.

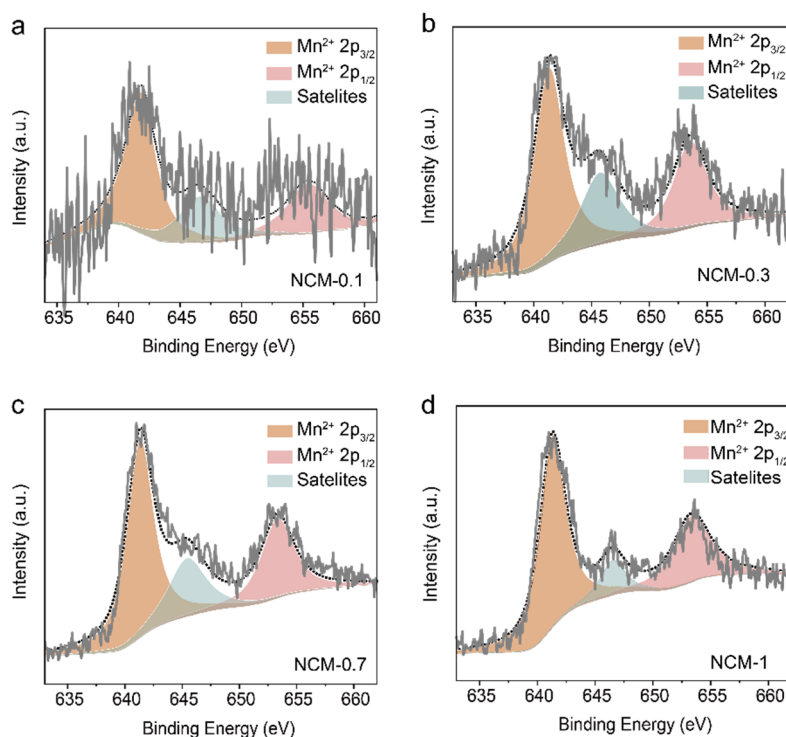

**Figure S3.** High resolution XPS spectra of Mn 2p of (a) NCM-0.1; (b) NCM-0.3; (c) NCM-0.7; (d) NCM-1.

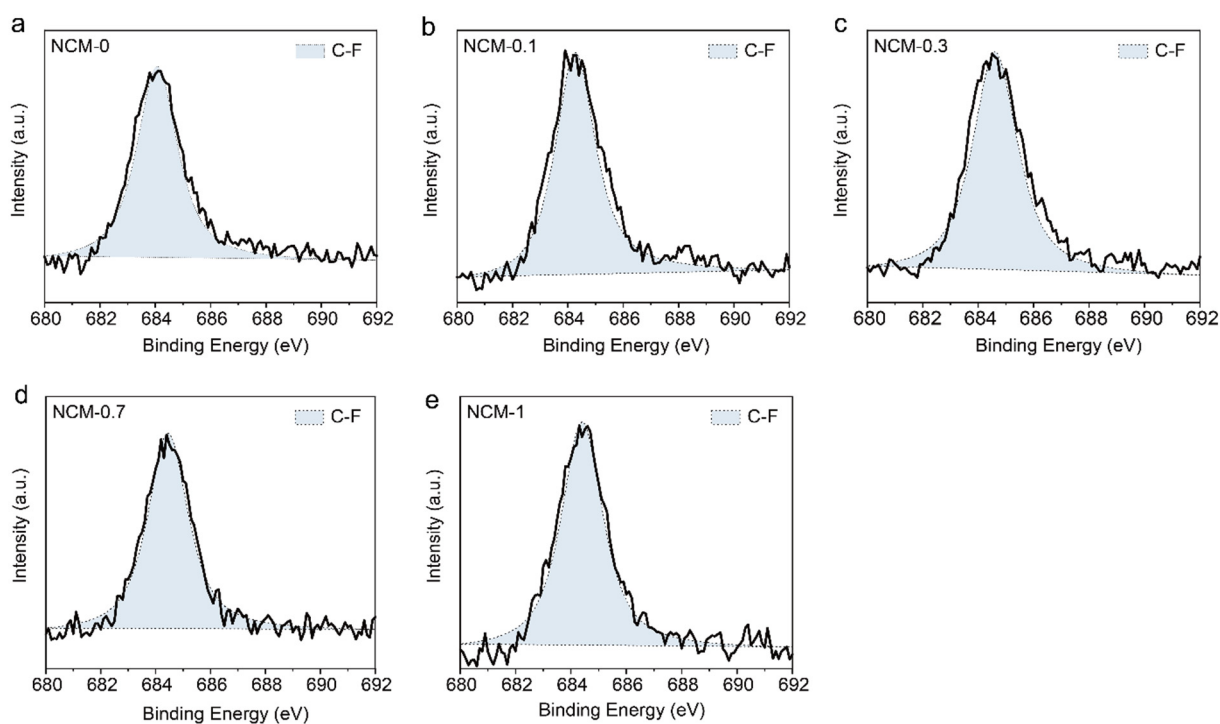

**Figure S4.** High resolution XPS spectra of F 1s of (a) NCM-0; (b) NCM-0.1; (c) NCM-0.3; (d) NCM-0.7; (e) NCM-1.

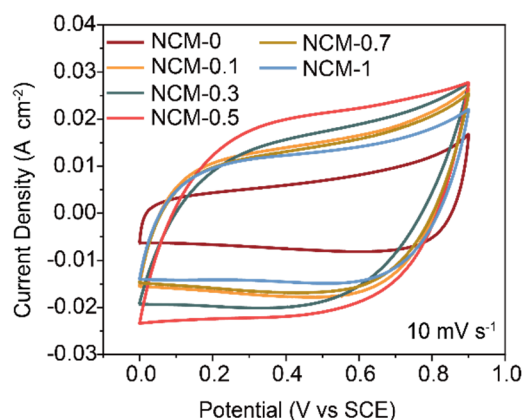

**Figure S5.** CV curves of NCM- $x$  ( $x=0, 0.1, 0.3, 0.5, 0.7, 1$ ) at the scanning rate of  $10 \text{ mV s}^{-1}$ .

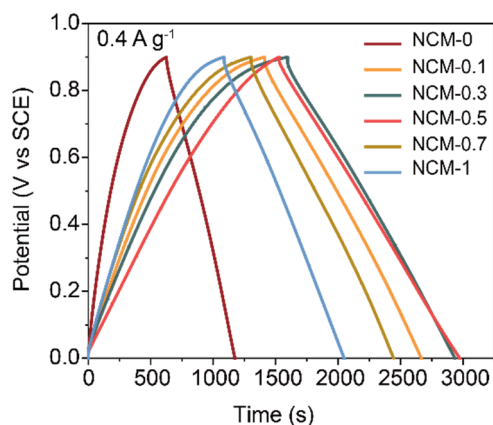

**Figure S6** GCD profiles of the NCM- $x$  ( $x=0, 0.1, 0.3, 0.5, 0.7, 1$ ) at the current density of  $0.4 \text{ A g}^{-1}$ .

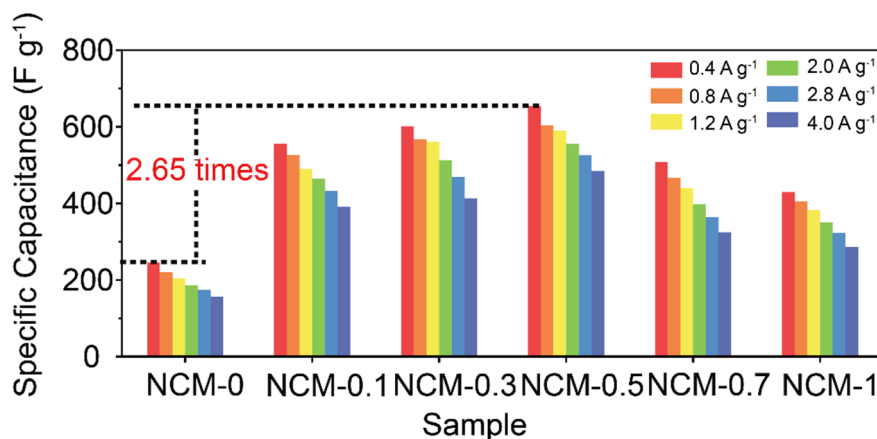

**Figure S7** the specific capacitance of the NCM- $x$  ( $x=0, 0.1, 0.3, 0.5, 0.7, 1$ ) at

various current densities.

**Table S1.** Comparison of specific capacitance, rate capability and cycling stability of NCM-0.5 with recently reported carbon-based electrodes.

| Electrode                                            | Maximum Specific Capacitance                    | Minimum Specific Capacitance                    | Rate Capability | Capacitance Retention |
|------------------------------------------------------|-------------------------------------------------|-------------------------------------------------|-----------------|-----------------------|
| HPC-700 <sup>[1]</sup>                               | 412.5 F g <sup>-1</sup> @ 0.5 A g <sup>-1</sup> | 253 F g <sup>-1</sup> @ 50 A g <sup>-1</sup>    | 61.3%           | 99.6% (10000)         |
| NIPCG <sup>[2]</sup>                                 | 673 F g <sup>-1</sup> @ 1 A g <sup>-1</sup>     | 481 F g <sup>-1</sup> @ 10 A g <sup>-1</sup>    | 71.5%           | 95% (1000)            |
| B/N-CNS <sup>[3]</sup>                               | 423 F g <sup>-1</sup> @ 0.2 A g <sup>-1</sup>   | 125 F g <sup>-1</sup> @ 50 A g <sup>-1</sup>    | 29.5%           | 100% (30000)          |
| pCA-KOH-700 <sup>[4]</sup>                           | 467 F g <sup>-1</sup> @ 1 A g <sup>-1</sup>     | 330 F g <sup>-1</sup> @ 10 A g <sup>-1</sup>    | 70.6%           | 85.7% (10000)         |
| HPC-700 <sup>[5]</sup>                               | 330 F g <sup>-1</sup> @ 1 A g <sup>-1</sup>     | 221 F g <sup>-1</sup> @ 20 A g <sup>-1</sup>    | 66.9%           | 90.5% (10000)         |
| NS-PCM-1000 <sup>[6]</sup>                           | 461.5 F g <sup>-1</sup> @ 0.1 A g <sup>-1</sup> | 187 F g <sup>-1</sup> @ 10 A g <sup>-1</sup>    | 40.5%           | 90% (23000)           |
| NCNF2-900 <sup>[7]</sup>                             | 224 F g <sup>-1</sup> @ 0.5 A g <sup>-1</sup>   | 149 F g <sup>-1</sup> @ 10 A g <sup>-1</sup>    | 66.5%           | 97% (10000)           |
| N/S-HCSs <sup>[8]</sup>                              | 280 F g <sup>-1</sup> @ 1 A g <sup>-1</sup>     | 134 F g <sup>-1</sup> @ 50 A g <sup>-1</sup>    | 47.8%           | 94.4% (10000)         |
| AHPC <sup>[9]</sup>                                  | 576 F g <sup>-1</sup> @ 1 A g <sup>-1</sup>     | 460.8 F g <sup>-1</sup> @ 10 A g <sup>-1</sup>  | 80%             | 95% (10000)           |
| 900N-Ti <sub>2</sub> CT <sub>x</sub> <sup>[10]</sup> | 327 F g <sup>-1</sup> @ 1 A g <sup>-1</sup>     | 282 F g <sup>-1</sup> @ 10 A g <sup>-1</sup>    | 86.2%           | 96.2% (5000)          |
| MAC-N-0.5 <sup>[11]</sup>                            | 385 F g <sup>-1</sup> @ 0.2 A g <sup>-1</sup>   | 332 F g <sup>-1</sup> @ 20 A g <sup>-1</sup>    | 86.3%           | 100% (10000)          |
| NOPC-2 <sup>[12]</sup>                               | 527 F g <sup>-1</sup> @ 1 A g <sup>-1</sup>     | 246 F g <sup>-1</sup> @ 200 A g <sup>-1</sup>   | 46.7%           | 94.3% (20000)         |
| N-GQD@cZIF-8/CNT <sup>[13]</sup>                     | 540 F g <sup>-1</sup> @ 0.5 A g <sup>-1</sup>   | 332.1 F g <sup>-1</sup> @ 20 A g <sup>-1</sup>  | 61.5%           | 90.9% (8000)          |
| HHCF <sup>[14]</sup>                                 | 361 F g <sup>-1</sup> @ 1 A g <sup>-1</sup>     | 182 F g <sup>-1</sup> @ 100 A g <sup>-1</sup>   | 50.4%           | 95.8% (10000)         |
| NPCN <sup>[15]</sup>                                 | 267 F g <sup>-1</sup> @ 1 A g <sup>-1</sup>     | 145 F g <sup>-1</sup> @ 50 A g <sup>-1</sup>    | 54%             | —                     |
| FCL700 <sup>[16]</sup>                               | 505.4 F g <sup>-1</sup> @ 0.1 A g <sup>-1</sup> | 216.1 F g <sup>-1</sup> @ 20 A g <sup>-1</sup>  | 42.7%           | 70.3% (2000)          |
| KNOSC <sup>[17]</sup>                                | 402.5 F g <sup>-1</sup> @ 1 A g <sup>-1</sup>   | 308.5 F g <sup>-1</sup> @ 100 A g <sup>-1</sup> | 76.6%           | 90% (30000)           |

|                              |                                                    |                                                  |              |                      |
|------------------------------|----------------------------------------------------|--------------------------------------------------|--------------|----------------------|
| 2D CoSNC <sup>[18]</sup>     | 360.1 F g <sup>-1</sup> @ 1.5 A g <sup>-1</sup>    | 204.5 F g <sup>-1</sup> @ 30 A g <sup>-1</sup>   | 56.8%        | 90% (2000)           |
| N-CNFs-900 <sup>[19]</sup>   | 202 F g <sup>-1</sup> @ 1 A g <sup>-1</sup>        | 164 F g <sup>-1</sup> @ 30 A g <sup>-1</sup>     | 81.2%        | 97% (3000)           |
| NCA-800 <sup>[20]</sup>      | 300 F g <sup>-1</sup> @ 0.5 A g <sup>-1</sup>      | 242 F g <sup>-1</sup> @ 10 A g <sup>-1</sup>     | 80.6%        | 98% (5000)           |
| PCNS-6 <sup>[21]</sup>       | 470 F g <sup>-1</sup> @ 1 A g <sup>-1</sup>        | 338 F g <sup>-1</sup> @ 20 A g <sup>-1</sup>     | 72%          | 98% (50000)          |
| 2D-HPCs <sup>[22]</sup>      | 250 F g <sup>-1</sup> @ 0.5 A g <sup>-1</sup>      | 185 F g <sup>-1</sup> @ 10 A g <sup>-1</sup>     | 74%          | 96% (10000)          |
| ZIF-8/ZTP <sup>[23]</sup>    | 341.2 F g <sup>-1</sup> @ 0.1 A g <sup>-1</sup>    | 181.3 F g <sup>-1</sup> @ 10 A g <sup>-1</sup>   | 53.1%        | 91.5% (50000)        |
| TCNQ-CTF-800 <sup>[24]</sup> | 383 F g <sup>-1</sup> @ 0.2 A g <sup>-1</sup>      | 197 F g <sup>-1</sup> @ 10 A g <sup>-1</sup>     | 51.4%        | 100% (10000)         |
| MPC-800 <sup>[25]</sup>      | 430 F g <sup>-1</sup> @ 0.5 A g <sup>-1</sup>      | 327 F g <sup>-1</sup> @ 10 A g <sup>-1</sup>     | 76.0%        | 100% (10000)         |
| <b>NCM-0.5</b>               | <b>653 F g<sup>-1</sup> @ 0.4 A g<sup>-1</sup></b> | <b>484 F g<sup>-1</sup> @ 4 A g<sup>-1</sup></b> | <b>74.1%</b> | <b>40000 (97.4%)</b> |

## References

- [1] Wang, Y.; Liu, R.; Tian, Y.; Sun, Z.; Huang, Z.; Wu, X.; Li, B. Heteroatoms-doped hierarchical porous carbon derived from chitin for flexible all-solid-state symmetric supercapacitors. *Chemical Engineering Journal*, **2019**, 384, 123263.
- [2] Chen, Z.; Zhao, S.; Zhao, H.; Zou, Y.; Yu, C.; Zhong, W. Nitrogen-doped interpenetrating porous carbon/graphene networks for supercapacitor applications. *Chemical Engineering Journal*, **2021**, 409, 127891.
- [3] Hao, J.; Wang, J.; Qin, S.; Liu, D.; Li, Y. B/N co-doped carbon nanosphere frameworks as high-performance electrodes for supercapacitors. *Journal of Materials Chemistry A*, **2018**, 6, 8053-8058.
- [4] Wei, X.; Wan, S.; Gao, S. Self-assembly-template engineering nitrogen-doped carbon aerogels for high-rate supercapacitors. *Nano Energy*, **2016**, 28, 206-215.
- [5] Qian, X.; Miao, L.; Jiang, J.; Ping, G.; Xiong, W.; Lv, Y.; Liu, Y.; Gan, L.; Zhu, D.; Liu, M. Hydrangea-like N/O codoped porous carbons for high-energy supercapacitors. *Chemical Engineering Journal*, **2020**, 388, 124208.
- [6] Lu, H.; Yang, C.; Chen, J.; Li, H.; Wang, J.; Wang, S. Tailoring Hierarchically

Porous Nitrogen-, Sulfur-Codoped Carbon for High-Performance Supercapacitors and Oxygen Reduction. *Small*, **2020**, *16*, 190584.

[7] Chen, H.; Liu, T.; Mou, J.; Zhang, W.; Jiang, Z.; Liu, J.; Huang, J.; Liu, M. Free-standing N-self-doped carbon nanofiber aerogels for high-performance all-solid-state supercapacitors. *Nano Energy*, **2019**, *63*, 103836.

[8] Miao, L.; Zhu, D.; Liu, M.; Duan, H.; Wang, Z.; Lv, Y.; Gan, Y. Cooking carbon with protic salt: Nitrogen and sulfur self-doped porous carbon nanosheets for supercapacitors. *Chemical Engineering Journal*, **2018**, *347*, 233-242.

[9] Zhao, G.; Chen, C.; Yu, D.; Sun, L.; Yang, C.; Zhang, H.; Sun, Y.; Besenbacher, F.; Yu, M. One-Step Production of O-N-S Co-Doped Three-Dimensional Hierarchical Porous Carbons for High-Performance Supercapacitors. *Nano Energy*, **2018**, *47*, 547-555.

[10] Yoon, Y.; Lee, M.; Kim, S. K.; Bae, G.; Song, W.; Sung, M.; Lim, J.; Lee, S. S.; Zyung, T.; An, K. S. A Strategy for Synthesis of Carbon Nitride Induced Chemically Doped 2D MXene for High-Performance Supercapacitor Electrodes. *Advanced Energy Materials*, **2018**, *8*, 1703173.

[11] Zhou, J.; Hou, L.; Lian, J.; Cheng, W.; Wang, D.; Gou, H.; Gao, F. Nitrogen-doped highly dense but porous carbon microspheres with ultrahigh volumetric capacitance and rate capability for supercapacitors. *Journal of Materials Chemistry A*, **2019**, *7*, 476-485.

[12] Hou, L.; Yang, W.; Li, Y.; Wang, P.; Jiang, B.; Xu, C.; Zhang, C.; Huang, G.; Yang, F.; Li, Y. Dual-template endowing N, O co-doped hierarchically porous carbon from potassium citrate with high capacitance and rate capability for supercapacitors. *Chemical Engineering Journal*, **2021**, *417*, 129289.

[13] Li, Z.; Liu, X.; Wang, L.; Bu, F.; Wei, J.; Pan, D.; Wu, M. Hierarchical 3D All-Carbon Composite Structure Modified with N-Doped Graphene Quantum Dots for High-Performance Flexible Supercapacitors. *Small*, **2018**, *14*, 1801498.

[14] Deng, X.; Li, J.; Zhu, S.; Ma, L.; Zhao, N. Boosting the capacitive storage performance of MOF-derived carbon frameworks via structural modulation for

supercapacitors. *Energy Storage Materials*, **2019**, 23, 491-498.

[15] Kale, V. S.; Hwang, M.; Chang, H.; Kang, J.; Chae, I. S.; Jeon, Y.; Yang, J.; Kim, J.; Ko, Y. J.; Piao, Y.; Hyeon, T. Microporosity-Controlled Synthesis of Heteroatom Codoped Carbon Nanocages by Wrap-Bake-Sublime Approach for Flexible All-Solid-State-Supercapacitors. *Advanced Functional Materials*, **2018**, 28, 1803786.

[16] Peng, Z.; Hu, Y.; Wang, J.; Liu, S.; Li, C.; Jiang, Q.; Lu, J.; Zeng, X.; Peng, P.; Li, F. F. Fullerene-Based In Situ Doping of N and Fe into a 3D Cross-Like Hierarchical Carbon Composite for High-Performance Supercapacitors. *Advanced Energy Materials*, **2019**, 9, 1802928.

[17] Peng, H.; Yao, B.; Wie, X.; Liu, T.; Kou, T.; Xiao, P.; Zhang, Y.; Li, Y. Pore and Heteroatom Engineered Carbon Foams for Supercapacitors. *Advanced Energy Materials*, **2019**, 9, 1803665.

[18] Cao, F.; Zhao, M.; Yu, Y.; Chen, B.; Huang, Y.; Yang, J.; Cao, X.; Lu, Q.; Zhang, X.; Zhang, Z.; Tan, C.; Zhang, H. Synthesis of Two-Dimensional CoS<sub>1.097</sub>/Nitrogen-Doped Carbon Nanocomposites Using Metal-Organic Framework Nanosheets as Precursors for Supercapacitor Application. *Journal of the American Chemical Society*, **2016**, 138, 6924-6927.

[19] Chen, L. F.; Zhang, X. D.; Liang, H. W.; Kong, M.; Guan, Q. F.; Chen, P.; Wu, Z. Y.; Yu, S. H. Synthesis of nitrogen-doped porous carbon nanofibers as an efficient electrode material for supercapacitors. *Acs Nano*, **2012**, 6, 7092-7102.

[20] Li, H.; Li, J.; Thomas, A.; Liao, Y. Ultra-High Surface Area Nitrogen-Doped Carbon Aerogels Derived From a Schiff-Base Porous Organic Polymer Aerogel for CO<sub>2</sub> Storage. *Advanced Functional Materials*, **2019**, 28, 1904785.

[21] Chen, C.; Yu, D.; Zhao, G.; Du, B.; Tang, W.; Sun, L.; Sun, Y.; Besenbacher, F.; Yu, M. Three-dimensional scaffolding framework of porous carbon nanosheets derived from plant wastes for high-performance supercapacitors. *Nano Energy*, **2016**, 27, 377-389.

[22] Yao, L.; Wu, Q.; Zhang, P.; Zhang, J.; Wang, D.; Li, Y.; Ren, X.; Mi, H.; Deng,

L.; Zheng, Z. Scalable 2D Hierarchical Porous Carbon Nanosheets for Flexible Supercapacitors with Ultrahigh Energy Density. *Advanced Materials*, **2018**, *30*, 1706054.

[23] Yuksel, R.; Buyukcakil, O.; Panda, P. K.; Lee, S. H.; Jiang, Y.; Singh, D.; Hansen, S.; Adelung, R.; Mishra, Y. K.; Ahujia, R.; Ruoff, R. S. Necklace-like Nitrogen-Doped Tubular Carbon 3D Frameworks for Electrochemical Energy Storage. *Advanced Functional Materials*, **2020**, *30*, 1909725.

[24] Li, Y.; Zheng, S.; Liu, X.; Li, P.; Sun, L.; Yang, R.; Wang, S.; Wu, Z. S.; Bao, X.; Deng, W. Q. Conductive Microporous Covalent Triazine-Based Framework for High-Performance Electrochemical Capacitive Energy Storage. *Angewandte Chemie International Edition*, **2018**, *57*, 7992-7996.

[25] Ding, C.; Liu, T.; Yan, X.; Huang, L.; Ryu, S.; Lan, J.; Yu, Y.; Zhong, W. H.; Yang, X. An ultra-microporous carbon material boosting integrated capacitance for cellulose-based supercapacitors. *Nano-Micro Letters*, **2020**, *12*, 1-17.
